# Supplementary material for: Ivermectin Inhibits Bovine Herpesvirus 1 DNA Polymerase Nuclear Import and Interferes With Viral Replication
Source: MDPI journal article supplement (doi:10.3390/microorganisms8030409), 2020-03-13

**Figure S1. Antiviral activity of Ivermectin against BoHV-1.** MDBK cells were treated with indicated concentrations of Ivermectin following viral infection at MOI of 1 (A) and 0.1 (B).. Viral titers were determined using plaque assay. The results shown represent the means  $\pm$ SD (error bars) from three independent experiments. Statistical significance was calculated using Student's *t* test according to \* $p < 0.05$ , \*\* $p < 0.01$ , and \*\*\*  $p < 0.001$ .

## Supplementary Figure 1

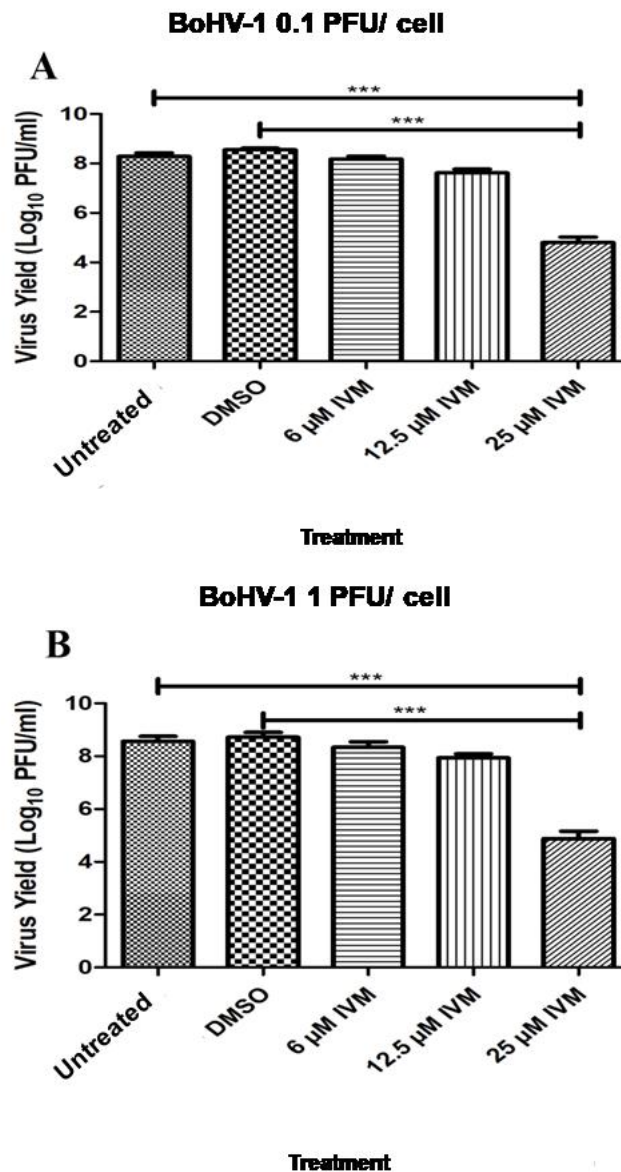

Supplement: s1 [file s1]
